# Supplementary material for: A γ-Glutamyl Transpeptidase (GGT)-Triggered Charge Reversal Drug-Delivery System for Cervical Cancer Treatment: In Vitro and In Vivo Investigation
Source: MDPI journal article supplement (doi:10.3390/pharmaceutics15051335), 2023-04-25
Supplement: s1 [file s1]

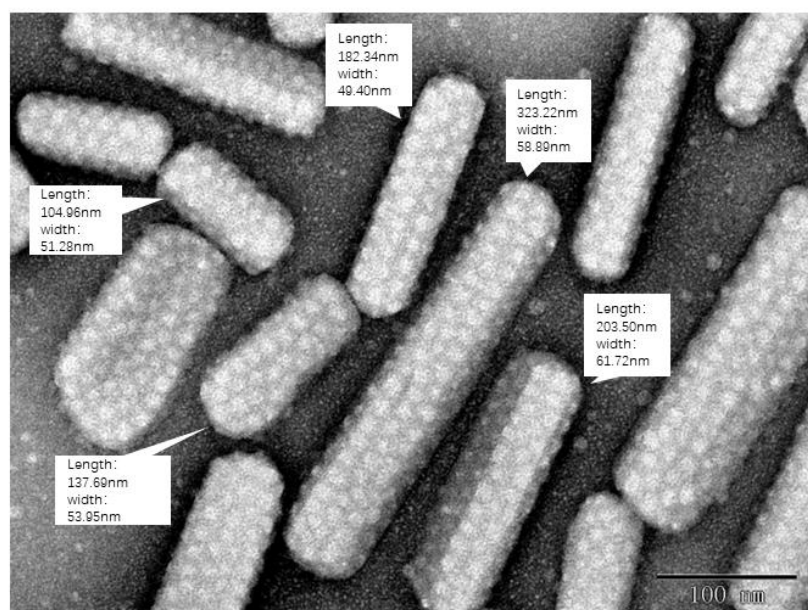

**Figure S1:** Transmission Electron Microscopy image of PTX-DPG NPs with the measured length and width.
